RESEARCH ARTICLE

# A Survey of Rounding Practices in Canadian Adult Intensive Care Units

Jessalyn K. Holodinsky<sup>1</sup>, Marilynne A. Hebert<sup>1</sup>, David A. Zygun<sup>2</sup>, Romain Rigal<sup>3</sup>, Simon Berthelot<sup>4</sup>, Deborah J. Cook<sup>5</sup>, Henry T. Stelfox<sup>1,6\*</sup>

**1** Department of Community Health Sciences, University of Calgary, Calgary, Alberta, Canada, **2** Division of Critical Care Medicine, University of Alberta, Edmonton, Alberta, Canada, **3** Centre De Recherche, l'Université de Montréal, Montréal, Québec, Canada, **4** Département de Médecine d'Urgence, CHU de Québec, Québec City, Québec, Canada, **5** Faculty of Health Sciences, McMaster University, Hamilton, Ontario, Canada, **6** Department of Critical Care Medicine, University of Calgary and Alberta Health Services, Calgary, Alberta, Canada

\* [tstelfox@ucalgary.ca](mailto:tstelfox@ucalgary.ca)

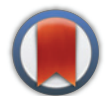

CrossMark  
click for updates

OPEN ACCESS

**Citation:** Holodinsky JK, Hebert MA, Zygun DA, Rigal R, Berthelot S, Cook DJ, et al. (2015) A Survey of Rounding Practices in Canadian Adult Intensive Care Units. PLoS ONE 10(12): e0145408. doi:10.1371/journal.pone.0145408

**Editor:** Jeffrey A. Gold, Oregon Health and Science University, UNITED STATES

**Received:** September 28, 2015

**Accepted:** December 3, 2015

**Published:** December 23, 2015

**Copyright:** © 2015 Holodinsky et al. This is an open access article distributed under the terms of the [Creative Commons Attribution License](https://creativecommons.org/licenses/by/4.0/), which permits unrestricted use, distribution, and reproduction in any medium, provided the original author and source are credited.

**Data Availability Statement:** All relevant data are within the paper and its Supporting Information files.

**Funding:** The project was supported by an establishment grant from Alberta Innovates – Health Solutions. The funders had no role in study design, data collection and analysis, decision to publish, or preparation of the manuscript.

**Competing Interests:** Ms. Holodinsky was supported by a Ward of the 21st Century Health Services Research Scholarship funded by Alberta Innovates - Health Solutions' Collaborative Research and Innovation Opportunity Team Grant. Dr. Cook is a

## Abstract

### Objective

To describe rounding practices in Canadian adult Intensive Care Units (ICU) and identify opportunities for improvement.

### Design

Mixed methods design. Cross sectional survey of Canadian Adult ICUs (n = 180) with purposefully sampled follow-up interviews (n = 7).

### Measurements and Main Results

Medical directors representing 111 ICUs (62%) participated in the survey. Rounding practices varied across ICUs with the majority reporting the use of interprofessional rounds (81%) that employed an open (94%) and collaborative (86%) approach, occurred at the patient's bedside (82%), and started at a standard time (79%) and standard location (56%). Most participants reported that patients (83%) and family members (67%) were welcome to attend rounds. Approximately half of ICUs (48%) used tools to facilitate rounds. Interruptions during rounds were reported to be common (i.e., ≥1 interruption for ≥50% of patients) in 46% of ICUs. Four themes were identified from qualitative analysis of participant responses to open-ended survey questions and interviews: *multidisciplinarity, patient and family involvement, factors influencing productivity, and teaching and learning.*

### Conclusions

There is considerable variation in current rounding practices in Canadian medical/surgical ICUs. Opportunities exist to improve ICU rounds including ensuring the engagement of essential participants, clearly defining participant roles, establishing a standardized approach to the rounding process, minimizing interruptions, modifying the role of teaching, utilizing a structured rounding tool, and developing a metric for measuring rounding quality.

Research Chair of the Canadian Institutes for Health Research. Dr. Stelfox is supported by a Population Health Investigator Award from Alberta Innovates – Health Solutions. None of the authors have financial or professional conflicts of interest that would influence the conduct or reporting of this study. Funding sources had no role in the design, conduct, or reporting of this study and the authors are unaware of any conflicts of interest. This does not alter the authors' adherence to PLOS ONE policies on sharing data and materials.

## Introduction

Effective communication among healthcare providers (subsequently referred to as providers) is essential for high quality patient care. Ineffective communication is associated with medical errors and adverse events[1–3]. For patients admitted to the Intensive Care Unit (ICU), the most important regularly scheduled communication occurs during patient care rounds—a key forum for providers to review the patient's condition and progress, discuss diagnostic, preventative, and therapeutic options, and make important patient care decisions.

A systematic review performed by Lane et al (2013)[4], which was recently updated[5], identified 13 best practices for ICU patient care rounds. These included implementing inter-professional rounds (physician, nurse, and pharmacist at minimum)[6–15]; standardizing practices[16–19]; defining roles for all participants[20–23]; using a structured tool[24–35]; reducing time spent on non-essential activities[17,18]; minimizing interruptions[36–38]; developing and documenting daily goals[22,31,39,40]; considering the best location of rounds (bedside vs. conference room) to optimize patient-centeredness and efficiency[36,41–43]; and establishing both an open and collaborative discussion environment[16,42–44]. All of these best practices were reported to potentially improve rounds either by increasing provider satisfaction, reducing rounding time, or improving patient outcomes. A separate systematic review of pediatric ICUs[45] and related literature [46–55] reported that family presence and participation in rounds created a patient-centered environment, enhanced communication, and increased both family and provider satisfaction. The role of families in rounds in adult ICUs is less well defined and two recent studies have reported both positive and negative provider perceptions[56,57].

While best rounding practices[4] have been proposed, it is unknown if these practices are used in daily patient care. We therefore conducted a cross sectional survey of Canadian adult medical/surgical ICUs with follow up interviews to describe current rounding practices and to identify opportunities for improvement.

## Materials and Methods

This study was approved by the Conjoint Health Research Ethics Board at the University of Calgary, which waived the need for written informed consent.

### Study Design

This was a two-part mixed methods study. First, we surveyed ICU medical directors to describe the structure, process, and outcomes of rounds in their adult ICUs. Second, we performed follow up interviews to further characterize rounding practices.

### Survey and Interview Guide Development

We employed a conceptual framework derived from the Institute of Medicine's Aims for 21<sup>st</sup> Century Healthcare[58], and Donabedian's quality of care framework[59]. We developed survey questions using the 9 best practices previously reported in the literature that were most amenable to survey/interview data collection: interprofessional rounds, standardizing time and location, defining participant roles, tool use, minimizing interruptions, focusing on goal development, promoting patient-centeredness through bedside discussion, promoting efficiency by using conference room discussion, and ensuring an open and collaborative environment [4]. Questions were developed to assess self-perceived quality and room for improvement of patient care rounds using an ordinal scale from 1 to 10. We developed open-ended style questions to assess participant's opinions on positive and negative aspects of rounds. Participants were

asked to forward (email, fax, mail) any tools used to facilitate rounds. We pilot tested the survey to assess length, flow, readability, and clinical sensibility using a convenience sample of 20 ICU providers (S1 File). One of the authors (S.B.) a physician fluent in both English and French translated the survey into French and translated responses to open text questions from French into English for analysis.

We developed interview questions to elicit individual provider roles during rounds, tools used during rounds, facilitators and barriers to rounding practices, and suggestions to improve rounding practices. The interview guide was pilot tested on a convenience sample of ICU physicians (S2 File).

## Data Collection

We surveyed Medical Directors of ICUs (or their designates) that satisfied the following inclusion criteria: 1) located in Canada; 2) primarily adult patients ( $\geq 18$  years old); 3) population of medical and/or surgical patients. Specialty ICUs (including but not limited to cardiac/cardiovascular, neurologic, and burn ICUs) and pediatric ICUs were excluded from the study as their highly specific patient populations may influence their rounding practices. We identified medical directors by searching hospital websites, phoning hospitals, and consulting provincial ICU leaders. Medical directors were sent the survey using a secure online survey software ([www.surveymonkey.net](http://www.surveymonkey.net)). Non-respondents were sent up to three reminders at two-week intervals.

We conducted semi-structured individual telephone interviews with ICU medical directors. Participants were purposively sampled (ensuring representation of both small and large ICUs and academic and non-academic ICUs from diverse geographic regions) to maximize the diversity of perspectives and experiences captured. The interviews were audio taped and transcribed for analysis. Interviews continued until saturation was reached.

## Data Analyses

We used descriptive statistics to report ICU rounding practices. Categorical variables were summarized as counts and percentages; continuous variables were reported as means and standard deviations (SD). Content items from collected tools were also analyzed descriptively.

Ordinal logistic regression was used to identify predictors of both self-rated rounding quality and self-rated room for improvement. The quality scores were combined into five groups (1–2, 3–4, 5–6, 7–8, 9–10) for analysis. Potential predictors were organized into three groups (according to Donabedian's structure, process, outcome framework[59]) and each of these groupings was analyzed in a separate model. All models were created using backward selection, where all predictors were initially included in the model and predictors with a p-value  $< 0.10$  were sequentially eliminated[60].

An inductive thematic analysis was performed jointly by two authors (J.K.H. & M.A.H.) on the open-ended survey questions and interview transcripts[61]. Data from the open-ended questions and interview transcripts were extracted and numbered by participant. The two authors iteratively analyzed the data by identifying common themes and subthemes and organizing the data respectively until both agreed on the themes, subthemes, their definitions, and the appropriate sorting of all comments.

## Results

From 180 eligible ICUs that were invited to participate in the survey, 107 individuals representing 111 ICUs (62%) from nine of ten provinces completed the survey; most (94%) respondents answered the open-ended questions. Using purposive sampling we contacted 30 individuals for follow-up interviews; 10 responded to our invitation to participate and 7 interviews were

**Table 1. Characteristics of Participating ICUs.**

| Characteristic                 | Number of ICUs                |                                |   |
|--------------------------------|-------------------------------|--------------------------------|---|
|                                | Survey Participants (N = 111) | Interview Participants (N = 7) |   |
| Province                       | Alberta                       | 13                             | 2 |
|                                | British Columbia              | 21                             | 1 |
|                                | Manitoba                      | 4                              | - |
|                                | New Brunswick                 | 3                              | - |
|                                | Newfoundland                  | 1                              | 1 |
|                                | Nova Scotia                   | 2                              | - |
|                                | Ontario                       | 32                             | 3 |
|                                | Prince Edward Island          | 0                              | - |
|                                | Quebec                        | 29                             | - |
|                                | Saskatchewan                  | 6                              | - |
| Number of Beds                 | < 10                          | 36                             | 1 |
|                                | 10–19                         | 42                             | 3 |
|                                | 20–29                         | 25                             | 3 |
|                                | 30–39                         | 7                              | - |
|                                | Missing                       | 1                              | - |
| Model of Care                  | Open: Intensivist Consult     | 15                             | - |
|                                | Closed: Intensivist Directed  | 94                             | 7 |
|                                | Mixed                         | 2                              | - |
| Academic ICU                   | Yes                           | 79                             | 5 |
|                                | No                            | 32                             | 2 |
| Participants Role              | Medical Director              | 45                             | 4 |
|                                | Intensive Care Physician      | 49                             | 3 |
|                                | Nurse Manager                 | 12                             | - |
|                                | Patient Care Coordinator      | 1                              | - |
| Types of Patients <sup>a</sup> | Medical                       | 110                            | 7 |
|                                | Surgical                      | 108                            | 7 |
|                                | Cardiac—Medical               | 61                             | 3 |
|                                | Neurologic                    | 56                             | 4 |
|                                | Trauma                        | 44                             | 3 |
|                                | Cardiac—Surgical              | 20                             | 2 |
|                                | Burns                         | 14                             | 1 |

<sup>a</sup> Numbers sum to greater than 111 (survey) or 7 (interviews) as some ICUs cared for multiple different types of patients

doi:10.1371/journal.pone.0145408.t001

performed. The characteristics of the ICUs are summarized in [Table 1](#); responses to all survey questions are included in Table A in [S3 File](#).

Four themes (multiple subthemes) emerged from analysis of the open-ended survey and interview questions: multidisciplinary, patient and family involvement, factors influencing productivity, and opportunities for teaching and learning ([Table 2](#)). Self-reported rounding practices are summarized in [Table 3](#). Responses to closed and open-ended survey and interview questions are reported below within the relevant themes and subthemes reflected in participant quotes.

### Role of Interprofessionalism

**Interprofessional Team.** The composition of the interprofessional rounding team varied across ICUs. The majority of ICUs reported that attending physicians (98%), bedside nurses

**Table 2. Thematic Analyses of Open-Ended Survey and Interview Questions.**

| Themes                                     | Subthemes                              | Items                              | Category of Care*           |           |
|--------------------------------------------|----------------------------------------|------------------------------------|-----------------------------|-----------|
| 1. Role of Interprofessionalism            | 1.1 Interprofessional Team             |                                    | Structure                   |           |
|                                            | 1.2 Interaction                        |                                    | Structure                   |           |
|                                            | 1.3 Open and Collaborative Environment |                                    | Structure                   |           |
|                                            | 1.4 Team Environment                   |                                    | Structure                   |           |
|                                            | 1.5 Communication                      |                                    | 1.5.1 Within ICU Care Team  | Structure |
|                                            |                                        |                                    | 1.5.2 Outside ICU Care Team |           |
|                                            | 1.6 Leadership and Roles               |                                    | Structure/Process           |           |
| 2. Patient and Family Involvement          | 2.1 Family                             |                                    | Process                     |           |
|                                            | 2.2 Patient                            |                                    | Process                     |           |
|                                            | 2.3 Both Patient and Family            |                                    | Process                     |           |
| 3. Factors Influencing Productivity        | 3.1 Interruptions                      | 3.1.1 Pages/Phone Calls            | Process                     |           |
|                                            |                                        | 3.1.2 Consultations                |                             |           |
|                                            |                                        | 3.1.3 Disruptive Behaviour         |                             |           |
|                                            |                                        | 3.1.4 Needs of Other Patients      |                             |           |
|                                            |                                        | 3.1.5 Non-Specific Causes          |                             |           |
|                                            | 3.2 Timing                             | 3.2.1 Timely                       | Structure                   |           |
|                                            |                                        | 3.2.2 Too Long                     |                             |           |
|                                            | 3.3 Inconsistent Attendance            |                                    |                             | Structure |
|                                            |                                        | 3.4 Inefficiencies                 |                             | Structure |
|                                            |                                        | 3.5 Inconsistent Rounding Practice |                             | Structure |
|                                            |                                        | 3.6 Care Plan Created              |                             | Process   |
|                                            |                                        | 3.7 Tools to Facilitate Rounds     |                             | Structure |
|                                            |                                        |                                    |                             |           |
| 4. Opportunities for Teaching and Learning | 4.1 Professional                       |                                    | Process                     |           |
|                                            | 4.2 Content                            |                                    | Process                     |           |

\*Categorized according to the Donabedian Structure, Process, and Outcome model of care. Structure refers to characteristics of the setting in which care occurs, this includes material resources, human resources, and organizational structure. Process refers to the actual giving and receiving of care including both the patient seeking out care and the providers activities in making diagnosis and treatment decisions. Outcome refers to the effects of care on the patient and/or population including the patient's satisfaction with care[59].

doi:10.1371/journal.pone.0145408.t002

(94%), respiratory therapists (89%), and pharmacists (85%) regularly attended rounds. Nine other providers were also reported to attend rounds by some ICUs (Figure A in [S4 File](#)). Ninety ICUs (81%) reported rounds that were interprofessional according to Lane et al.'s definition

**Table 3. Rounding Practices.**

| Practice Item             | Reported Frequency by Intensive Care UnitN = 111 [n (% of ICUs)] |          |
|---------------------------|------------------------------------------------------------------|----------|
| Open Environment          | 104 (94%)                                                        |          |
| Collaborative Environment | 95 (86%)                                                         |          |
| Interprofessional         | 90 (81%)                                                         |          |
| Standard Start Time       | 88 (79%)                                                         |          |
| Standard Start Location   | 62 (56%)                                                         |          |
| Rounding Tool Use         | 53 (48%)                                                         |          |
| Location of Rounds        | Patient's Bedside                                                | 91 (82%) |
|                           | Conference Room                                                  | 13 (12%) |
|                           | Combination of Both                                              | 7 (6%)   |

doi:10.1371/journal.pone.0145408.t003

(included at minimum an attending physician, bedside nurse, and pharmacist) [4] (Table 3). Survey respondents indicated that a positive aspect of the interprofessional team was that it improves the safety and quality of care, specifically: “overlapping responsibility hopefully results in catching ‘near misses’ or mistakes” and “[interprofessional rounds] lead to the best outcomes and shortest length of stay for the patient”. All participants reported their rounds were usually or always safe, and that medical errors never or sometimes occurred as a result of rounding practices (Figure B in S4 File). Conversely, survey respondents noted that negative aspects of a interprofessional team include: “some of the team members will go several patients without having meaningful contributions” and “because there are so many people it can be challenging to maintain a focused conversation.”

**Interaction.** Provider interaction was cited as one of the benefits to interprofessional rounds, especially: “the ability for all to participate” and “new ideas arising because of the process of interacting.” Other survey respondents cited that the different providers worked well together. Negative interactions were also reported including, “rounds vary depending on the individual intensivist as each interacts differently with the team.”

**Open and Collaborative Team Environment.** ICUs reported having an open (94%) and collaborative (86%) environment during rounds (Table 3). Survey respondents cited an open environment where “everyone has a voice” as a positive aspect of rounds. The commitment of the team members and being able to work together as a team were cited as a positive aspect of rounds.

“We do morning rounds sitting down around a conference table, it puts everyone on more or less a level playing field. So everyone can be seen and everyone has a place at the table so to speak and everyone can bring their issues.”

**Communication.** Communication between the different ICU providers, including having different providers together for “communication of the plan of care and advancement of care” was cited as a positive aspect of rounds. Communication was also brought up as a negative aspect of rounds in reference to a lack of dialogue between ICU and non-ICU providers (e.g., consulting physicians and surgeons).

“[The worst parts of rounds is] the lack of communication with the [non-ICU] teams and trying to guess what they are thinking while on our own ICU rounds”

**Leadership and Roles.** Participants reported different perspectives on provider roles in rounds. Physicians (attending and/or fellow) and nurses were both identified as potential leaders of rounds. Other providers were reported to be involved in presenting information and contributing to the development of a plan. One participant reported that respiratory therapists only participated on rounds for the mechanically ventilated patients.

“People who are participating know their roles and what they are expected to contribute and know also what to expect from others.”

## Patient and Family Involvement

Intensive care units reported that awake and aware patients (83%) and patient’s families (66%) participated in rounds. Five roles were described for the patients or their families among the

ICUs that included them in rounds (Table A in [S4 File](#)). The majority of interview participants listed the patient as a passive participant in rounds who was there to listen and receive clarification. Family members were more frequently identified as active participants who could provide information about the patient’s baseline functional and medical status, express wishes and provide input into decision-making.

“The involvement of patients and families is evolving and becoming more consistent.”

The majority (73%) of comments suggested that patient and family involvement in rounds was positive. Having the family present to discuss the care plan and treatment options was identified as a positive aspect of rounds for most, but a negative aspect of rounds for a minority (26%) of respondents. Family presence was specifically noted as being negative if “families [were not] clear about goals of care.”

The location of rounds was reported to directly affect patient and family participation. A small minority (12%) of ICUs conducted rounds away from the bedside in a conference room ([Table 3](#)).

“Rounds are conducted in a conference room. The patients and families are not part of rounds for this reason.”

### Factors Influencing the Productivity of Rounds

**Interruptions.** Forty-six percent of survey respondents reported that rounds were usually or always interrupted ([Fig 1](#)). The most common interruptions reported were answering pages and phone calls. Two distinct types of interruptions were described: those initiated by persons

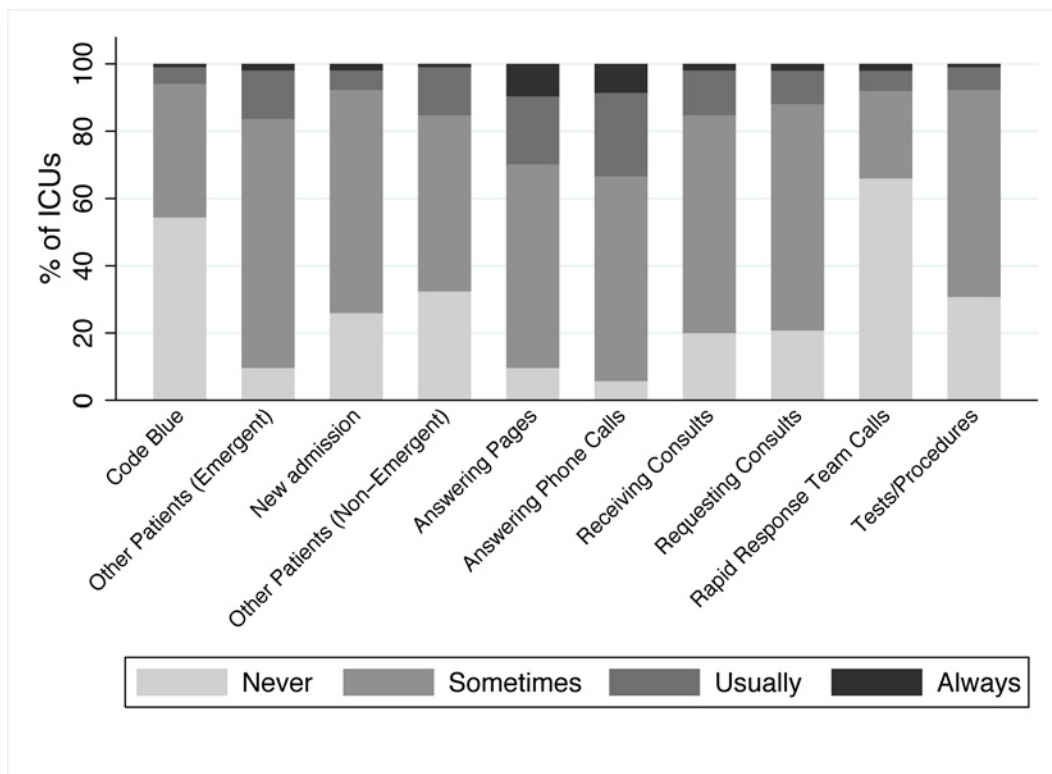

**Fig 1. Sources of Interruption During Patient Care Rounds.**

doi:10.1371/journal.pone.0145408.g001

outside the rounding team (e.g. pages, phone calls, consultations, and requests to address the needs of other patients) and those generated by members of the rounding team (e.g. side conversations and team members leaving to perform other tasks). Participants from ICUs where rounds were performed at the patient's bedside reported that rounds were usually or always interrupted in a similar proportion to those where rounds were conducted in a conference room (50% vs. 33%,  $p = 0.11$ ). Interruptions were the most common issue reported to affect productivity within the survey responses.

"[The worst aspects of rounds are] interruptions, phone calls, and consults. [Also] delaying rounds on a patient because there is another patient that needs more urgent attention."

**Timing.** The timing and duration of rounds was reported to impact quality. Survey respondents indicated that a median of 11 patients [interquartile range (IQR) 8 to 14 patients] were seen on rounds per day, with a median of 15 minutes (IQR 10 to 20 minutes) spent with each patient. Across all units the total median reported rounding time was 168 minutes (IQR 102 minutes to 245 minutes). The majority of ICUs (79%) specified a standard start time for rounds (Table 3). Survey respondents and interview participants noted that establishing a time for a specific patient's rounds as a challenge and frustration. Survey respondents noted that lengthy rounds negatively affected productivity, contributed to health care provider fatigue, inattention, and information being missed during the round and delayed patient care, especially transfers into and out of the ICU.

"Lengthy rounds create difficulty maintaining team focus, cause fatigue as rounds 'drag' on, and a large volume of information is managed creating the risk of missing important information"

**Inconsistent Attendance.** Inconsistent attendance of providers, including physicians, nurses, respiratory therapists, pharmacists, and social workers was reported to negatively affect productivity during patient care rounds. Interview participants identified increasing provider attendance as a strategy for improving rounds.

"Sometimes the person on call for the [previous] night won't attend rounds" "Unavailability of the bedside nurse" "Social work doesn't attend rounds"

**Inefficiencies.** The majority of survey respondents reported having efficient rounds (79%) that started at a standard location (56%) and were timely (95%) and equitable (ensuring each patient received the time and attention they required) (88%) for patients (Figure B in S4 File). Inefficiencies identified by survey respondents and interview participants included: lack of standardized rounding order, coordinating tests and procedures during rounds, spending too much time on minor issues, and spending too much time tracking down information and writing notes.

"At times, discussions do get beyond patient care in rounds which is essentially not needed"

**Inconsistent Rounding Practices.** Inconsistencies in practice were reported to adversely affect rounds. These included variation in rounding structure and process according to the



physician leading the rounds and the organization and experience of the providers presenting during rounds.

“The worst aspect of rounds is inconsistent physician practice (nursing practice as well)”

**Care Plan Created.** Survey respondents and interview participants highlighted that the primary purpose of rounds was to create a care plan that was understood by all members of the health care team. Nearly all ICUs (89%) reported that rounds usually or always resulted in a tangible care plan for the patient (effectiveness, Figure B in [S4 File](#)).

“[The best aspect of rounds is] actions are clearly identified for the next 24-hour period.”

**Tools to Facilitate Rounds.** About half of ICUs ( $n = 49$ , 48%) reported using a tool to facilitate rounds. Among these 31 reported using a checklist, 16 a goal sheet, and 17 another type of tool. Fifteen ICUs reported using more than one tool to facilitate patient care rounds. Fourteen ICUs provided copies of their tool(s), which were classified as checklists (a list of discussion points) or worksheets (containing items to be filled in) (Table B in [S4 File](#)). The interview participants mostly cited tool use as being positive and beneficial for both the patients and providers, although it was reported that tool use sometimes increased pre rounding preparation time.

“[The checklist] works pretty well because it’s not uncommon that we find something that we haven’t discussed yet. You know, had we not [used the checklist] we might have passed over something that was important.”

## Teaching and Learning

Survey respondents reported that a median of 80% (IQR 70–87.5%) of rounding time was spent on patient care activities and a median of 20% (IQR 10–25%) on teaching. The opportunity for teaching and learning for all health care providers was reported as positive and respondents from academic ICUs indicated that this was one of the purposes of rounds. Negative aspects included disruptions (e.g., trainees coming in and out of rounds for education purposes) associated with teaching as well as unequal time spent with patients.

“Sometimes teaching causes more time to be spent at one bedside and it is hard to say if this is justified.”

## Self-Reported Rounding Quality and Room for Improvement

Participants from each ICU were asked to provide a rating of their perceived rounding quality and room for improvement in rounds on an ordinal scale from one through ten ([Fig 2](#)). The median scores for perceived quality and room for improvement were 7 (interquartile range 7–8) and 7 (interquartile range 5–8) respectively. There was no association between participants self reported quality and room for improvement score ( $p = 0.2380$ ) (Figure C in [S4 File](#)).

[Table 4](#) summarizes the multivariable adjusted ordinal regression analyses of ICU rounding structures, processes and outcomes associated with self-reported perceptions of rounding

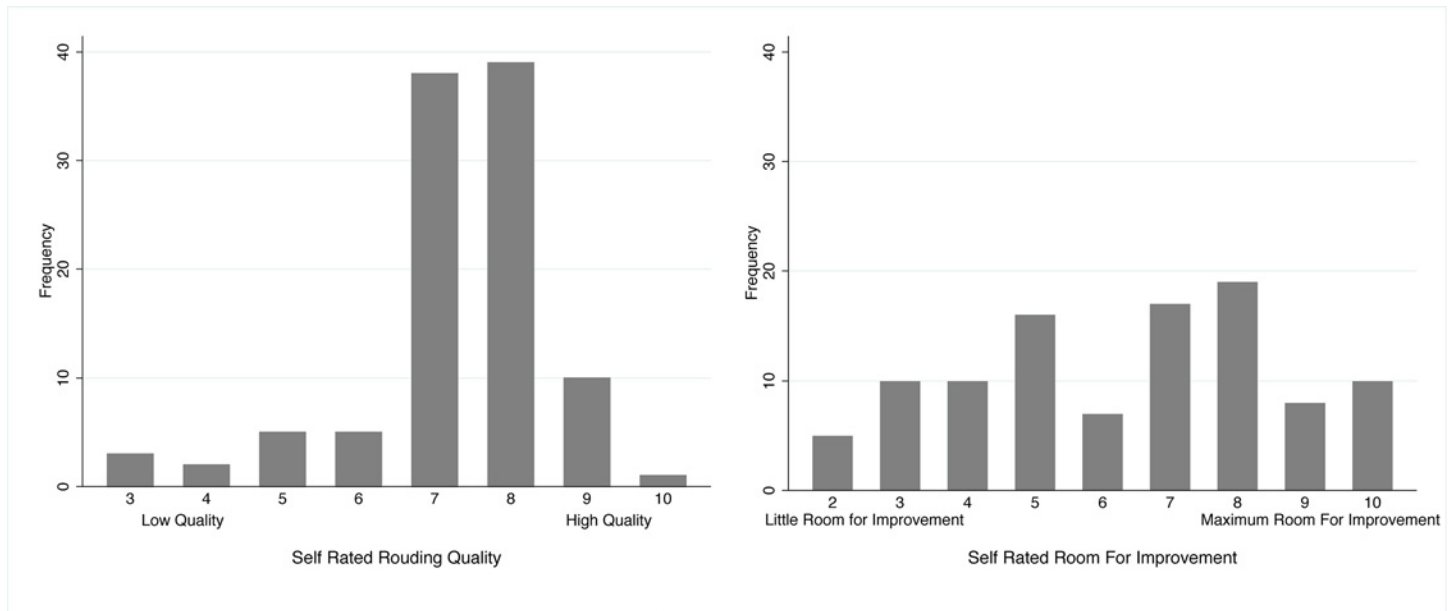

**Fig 2. Self-Rated Rounding Quality and Room For Improvement.**

doi:10.1371/journal.pone.0145408.g002

quality and opportunities for improvement. Frequent interruptions were associated with significantly decreased perceptions of rounding quality and increased perceived room for improvement. Conversely, timely rounds were associated with perceptions higher of rounding quality and a decreased need for improvement.

## Discussion

### Findings

We used mixed methods to describe rounding practices in Canadian ICUs. Survey respondents and interview participants highlighted four key themes: multidisciplinary, patient and family

**Table 4. Rounding Variables Associated with Self-Reported Rounding Quality and Room for Improvement.**

| Regression Model                   | Category  | Variable                                        | Adjusted Odds Ratio (95% CI) <sup>[a]</sup> | P-Value |
|------------------------------------|-----------|-------------------------------------------------|---------------------------------------------|---------|
| Self Reported Rounding Quality     | Structure | Academic Institution                            | 0.417 (0.148–1.172)                         | 0.097   |
|                                    |           | Standard Start Time                             | 10.646 (2.707–41.869)                       | 0.001   |
|                                    | Process   | Frequent Interruptions <sup>[b]</sup>           | 0.321 (0.121–0.853)                         | 0.023   |
|                                    | Outcome   | Safe                                            | 2.537 (0.972–6.619)                         | 0.057   |
|                                    |           | Timely (Not delaying patient care)              | 4.806 (1.507–15.326)                        | 0.008   |
| Self Reported Room for Improvement | Structure | Time Spent Per Patient (minutes) <sup>[c]</sup> | 1.062 (1.015–1.111)                         | 0.009   |
|                                    | Process   | Frequent Interruptions <sup>[b]</sup>           | 2.728 (1.318–5.648)                         | 0.007   |
|                                    | Outcome   | Safe                                            | 0.306 (0.145–0.648)                         | 0.002   |
|                                    |           | Timely (Not delaying patient care)              | 0.434 (0.180–1.048)                         | 0.063   |

<sup>a</sup> Odds ratio > 1 for self reported rounding quality indicates the variable is positively associated with an increased odds of reporting a higher rounding quality score on the ordinal scale. Odds ratio > 1 for self reported room for improvement indicates the variable is positively associated with an increased odds of reporting more room for improvement score on the ordinal scale.

<sup>b</sup> Reporting at least one interruption usually or always occurs during rounds

<sup>c</sup> Included as continuous variables

doi:10.1371/journal.pone.0145408.t004

involvement, factors influencing productivity, and opportunities for teaching and learning. We identified variable application of the practices proposed in the systematic review by Lane et al. [4]; some practices (open, collaborative, and interprofessional environment) were widely reported while others (tool use, standard start location) less so. Interruptions were reported to increase rounding time and decrease communication quality and rounding efficiency. Overall, ICUs reported high rounding quality, but identified opportunities for improvement.

## Recommendations

Our study highlights five opportunities for improving rounds (Fig 3).

The first recommendation from this study is that ICUs identify essential rounds participants relevant for their individual patient populations, mandate their attendance, define explicit roles for each participant, and create an explicit approach to the rounding process. The negative aspects of multidisciplinary suggest that the roles of the interprofessional team members and the rounding process may be unclear. Some participants reported a lack of consensus on who was the most appropriate leader for rounds and important variation in the structure and process of rounds among different physicians. Some providers did not consistently participate in or even attend rounds. Communication with non-ICU providers was reported as being poor or non-existent indicating that the role of the non-ICU provider during rounds might be unclear. This suggests that rounds should have a standardized structure and process, include a team of providers with clearly delineated roles and be directed by a provider (regardless of profession) with strong communication and team management skills. While encouraging the participation of interprofessional providers in rounds can be justified from the existing evidence-base, the optimal organizational structure and process for the team is less clear, would benefit from additional research and could include elements of leadership and teamwork training.

The second study recommendation is to minimize and manage interruptions during rounds. The number and variety of interruptions suggest that a multifaceted approach might be necessary to solve this problem. One option is to arrange for provider coverage during rounds (rapid response team, or covering MD/RN) to handle new urgent requests (e.g., patients not currently under the ICU team's care). Non-urgent requests, pages, and phone calls could be screened, triaged and collated by a provider not participating in rounds (e.g., one resident or designated nurse) and presented between patients or after rounds depending on time sensitivity. An education program regarding the potential risks associated with interrupting rounds (errors of omission or commission due to distractions, and delayed task completion) may help reduce non-urgent interruption frequency. In conjunction with this education program, an "interrupt only in emergencies" contract could be introduced in the unit to change the unit culture surrounding interruptions. A rounding tool could be used as a safeguard against missed information due to interruptions.

The third study recommendation is that additional research is needed to determine the role of patients and families in rounds. Our study findings showed that the involvement of the patient and family in rounds varied across ICUs. When the patient/family was involved they could take on a range of roles from observation to involvement in shared decision-making. While patient and family participation has been reportedly positive in neonatal and pediatric ICUs, there is limited research to support this in adult ICUs and further study is warranted [45,56,57].

The fourth study recommendation is that teaching be seamlessly incorporated into rounds so that it does not distract from patient care (but rather enhances care) and does not appreciably lengthen rounds or induce provider fatigue. While teaching and learning are essential elements of practice, they may also be seen as a hindrance to the rounding process, especially if

| Rounding Practice <sup>(4)</sup>                                                   | Pertinent Study Results                                                                                                                                                                                                                                                                                                                                                                | Study Recommendation                                                                                                                                                                                                                                                                                                                                                                                                                                         |
|------------------------------------------------------------------------------------|----------------------------------------------------------------------------------------------------------------------------------------------------------------------------------------------------------------------------------------------------------------------------------------------------------------------------------------------------------------------------------------|--------------------------------------------------------------------------------------------------------------------------------------------------------------------------------------------------------------------------------------------------------------------------------------------------------------------------------------------------------------------------------------------------------------------------------------------------------------|
| <b>Recommendation #1</b>                                                           |                                                                                                                                                                                                                                                                                                                                                                                        |                                                                                                                                                                                                                                                                                                                                                                                                                                                              |
| Multidisciplinary rounds                                                           | <ul style="list-style-type: none"> <li>- Variable rounding practices</li> <li>- Inconsistent attendance/participation</li> <li>- Too many participants leads to chaos and lack of focus</li> </ul>                                                                                                                                                                                     | All ICUs should identify essential participants, mandate their attendance, clearly define their roles (especially in terms of leadership), and create an explicit approach to the rounding process                                                                                                                                                                                                                                                           |
| Define explicit roles for each provider                                            | <ul style="list-style-type: none"> <li>- Unclear leadership</li> </ul>                                                                                                                                                                                                                                                                                                                 |                                                                                                                                                                                                                                                                                                                                                                                                                                                              |
| Standardized approach to rounds                                                    | <ul style="list-style-type: none"> <li>- Knowing what to expect mentioned as positive</li> <li>- Differential rounding practices</li> </ul>                                                                                                                                                                                                                                            |                                                                                                                                                                                                                                                                                                                                                                                                                                                              |
| <b>Recommendation #2</b>                                                           |                                                                                                                                                                                                                                                                                                                                                                                        |                                                                                                                                                                                                                                                                                                                                                                                                                                                              |
| Minimize unnecessary interruptions                                                 | <ul style="list-style-type: none"> <li>- High interruption frequency, leading to decreased rounding productivity</li> <li>- High interruption frequency, leading to decreased rounding quality and increased room for improvement</li> <li>- It is unclear whether the frequency of interruptions is different between those conducted at the bedside and a conference room</li> </ul> | <p>All ICUs should minimize and manage interruptions to the rounding process. This could include:</p> <ul style="list-style-type: none"> <li>- Arranging for provider coverage</li> <li>- Screening non-urgent requests</li> <li>- Educating providers on interruptions</li> <li>- Implementing a checklist</li> <li>- Interrupting only in emergencies</li> <li>- Further study the association between the location of rounds and interruptions</li> </ul> |
| <b>Recommendation #3</b>                                                           |                                                                                                                                                                                                                                                                                                                                                                                        |                                                                                                                                                                                                                                                                                                                                                                                                                                                              |
| Conduct discussions in a conference room to promote efficiency                     | <ul style="list-style-type: none"> <li>- Conference room rounds preclude patient and family involvement</li> </ul>                                                                                                                                                                                                                                                                     | Further study into patient and provider satisfaction with patient and family involvement in rounds in adult ICUs. The location of rounds should be taken into account in further studies.                                                                                                                                                                                                                                                                    |
| Conduct discussions at the bedside to promote patient-centeredness                 | <ul style="list-style-type: none"> <li>- The attitudes towards patient and family involvement in rounds varied greatly between ICUs</li> <li>- The type of patient and family involvement in rounds varied greatly between ICUs</li> </ul>                                                                                                                                             |                                                                                                                                                                                                                                                                                                                                                                                                                                                              |
| <b>Recommendation #4</b>                                                           |                                                                                                                                                                                                                                                                                                                                                                                        |                                                                                                                                                                                                                                                                                                                                                                                                                                                              |
| Reduce nonessential time wasting activities                                        | <ul style="list-style-type: none"> <li>- Attitudes surrounding teaching during rounds varied between ICUs</li> <li>- Teaching was often reported as an inefficient use of rounding time</li> </ul>                                                                                                                                                                                     | <p>Modify approach to teaching during rounds:</p> <ul style="list-style-type: none"> <li>- Seamless incorporation into rounds process</li> <li>- Engage all providers</li> <li>- Lengthy or targeted teaching should be completed outside of rounds</li> <li>- Conduct during rounds to role model patient care, leadership and teamwork</li> </ul>                                                                                                          |
| <b>Recommendation #5</b>                                                           |                                                                                                                                                                                                                                                                                                                                                                                        |                                                                                                                                                                                                                                                                                                                                                                                                                                                              |
| Develop a reliable and valid metric to measure the quality of patient care rounds. |                                                                                                                                                                                                                                                                                                                                                                                        |                                                                                                                                                                                                                                                                                                                                                                                                                                                              |

**Fig 3. Study Recommendations.**

doi:10.1371/journal.pone.0145408.g003

teaching and learning are not viewed as the purpose of patient care rounds by some participants. Teaching during rounds should engage all providers as best possible, and may involve a range of strategies such as eliciting suggested approaches to a problem, listing possible complications, briefly citing the evidentiary basis for decisions and other role modeling. Supplemented by profession-specific (e.g. residents) sessions outside of rounds to ensure an inclusive and streamlined process. The ideal balance between concrete patient care activities and educating providers is unknown and likely to vary between circumstances (e.g., less teaching and more patient care when there are urgent patient care activities). Additional research would be valuable in delineating the frequency (i.e., what proportion of patients), duration (i.e., what is the optimal length of time), organization (i.e., how many teaching points per education episode), content (i.e., how is the teaching linked to patient care decision-making) and participants (i.e., which providers should be engaged) in rounding related educational activities and how these are impacted by and on patient care activities (i.e., what is the interaction between patient care activities and educational activities).

The final recommendation is the need to develop a comprehensive measure to evaluate ICU rounding practice quality. Overall, ICUs reported high rounding quality, but then identified many opportunities for improvement. How can these conflicting reports be reconciled? Medical directors may perceive continuous quality improvement as important regardless of the care provided. This perspective would be consistent with the observed absence of a relationship between self-reported rounding quality and perceived room for improvement (Figure C in [S4 File](#)). Alternatively, self-report may be a poor indicator of rounding quality. For example, the factors associated with self-reported quality of rounds and room for improvement in the quantitative data included timeliness, interruptions, and safety whereas multidisciplinary, team environments, and communication were highlighted as being some of the best and worst aspects of rounds in the qualitative data. These discrepancies could represent different constructs for improvement identified using different methodologies, and/or reflect the challenges of using self-report as a metric of the quality rounding. We based our survey and interview guide on a systematic review of evidence informed ICU rounding practices, but we are only aware of one validated measure of rounding quality[62]. This metric focuses on the content discussed during rounds and interdisciplinary collaboration, but does not assess other aspects of rounds identified as areas for potential improvement. Without reliable and valid metrics it is difficult to objectively assess rounding quality, identify gaps and evaluate the effect the efficacy of interventions designed to improve rounding quality.

Finally, we have proposed a comprehensive rounding tool ([S5 File](#)) to be used in conjunction with these recommendations. While the use of tools to facilitate rounds has been previously recommended[4] and using a tool was often cited as a positive aspect of rounds in our survey data, only 48% of ICUs reported using rounding tools. Why do less than half of ICUs report using a rounding tool? One potential explanation is that developing a locally customized tool is time consuming and there are currently no recommendations on what items a rounding tool should contain. A generic tool may address this challenge, but risks not meeting local needs. The tool proposed in our manuscript represents a composite of items identified from the tools collected from ICUs in the study, interview responses and recommendations from checklist creation guidelines[63]. It represents one potential starting point for ICUs interested in adopting and/or adapting an ICU rounding tool, but like all instruments will need to be evaluated for both intended (e.g., increasing the effectiveness of rounds) and unintended (e.g., increasing the duration of rounds) consequences.

## Limitations

These results are generalizable to small and medium sized academic medical and/or surgical ICUs utilizing a closed model of care, but it is unclear whether they reflect the rounding methods or experiences of subspecialty ICUs or ICUs using different models of care. Furthermore, these results represent the perspectives of ICU medical directors or their designates, the majority of whom are physicians; other providers may have different perspectives and these should be considered in future research and quality improvement initiatives. The data are self-reported, may represent idealized views, and may therefore underestimate opportunities to improve the quality of rounds. Finally, the observations are largely reported as independent measures for the purposes of simplicity, but may be interrelated. For example, incorporating interprofessional rounds with clearly defined participant roles may increase provider satisfaction and decrease rounding variability, but may also impact the duration of rounds.

## Conclusions

This study found that the conduct of ICU rounds is a crucial but variable aspect of patient care, with differential adoption of recommended practices. Opportunities to improve rounds include establishing a standardizing team composition and roles, minimizing interruptions, determining the optimal location(s) for rounds, seamlessly integrating education with patient care, and incorporating a structured tool to facilitate rounds. There is an urgent need to develop instruments to objectively measure rounding quality to guide quality improvement efforts.

## Supporting Information

### **S1 File. National Survey of ICU Patient Care Rounds.**

(PDF)

### **S2 File. Interview Guide.**

(PDF)

### **S3 File. Survey Responses.** Table A. Survey Responses.

(PDF)

**S4 File. Figures and Tables.** Figure A. Health Care Providers Who Regularly Attend Patient Care Rounds. Figure B. Evaluation of Rounds Using the IOM Aims for 21<sup>st</sup> Century Health Care[58]. Figure C. Relationship Between Self-Reported Rounding Quality and Room For Improvement Scores. Table A: Role of the Patient and Family During Rounds. Table B: Characteristics of Tools Provided.

(PDF)

### **S5 File. Rounding Tool.**

(PDF)

## Author Contributions

Conceived and designed the experiments: JKH MAH DAZ HTS. Performed the experiments: JKH. Analyzed the data: JKH MAH. Wrote the paper: JKH MAH DAZ RR SB DJC HTS. Provided French English translation of survey and responses: SB. Recruited French speaking participants: RR.

## References

1. The Joint Commission. 2007 Annual Report: Improving America's Hospitals. 2007;; 1–135.

2. Baggs JG, Schmitt MH, Mushlin AI, Mitchell PH, Eldredge DH, Oakes D, et al. Association between nurse-physician collaboration and patient outcomes in three intensive care units. *Critical Care Medicine*. 1999; 27: 1991–1998. PMID: [10507630](#)
3. Williams M, Hevelone N, Alban RF, Hardy JP, Oxman DA, Garcia E, et al. Measuring Communication in the Surgical ICU: Better Communication Equals Better Care. ACS. Elsevier Inc; 2010; 210: 17–22. doi: [10.1016/j.jamcollsurg.2009.09.025](#)
4. Lane D, Ferri M, Lemaire J, McLaughlin K, Stelfox HT. A systematic review of evidence-informed practices for patient care rounds in the ICU\*. *Critical Care Medicine*. 2013; 41: 2015–2029. doi: [10.1097/CCM.0b013e31828a435f](#) PMID: [23666096](#)
5. Holodinsky JK, Lane D, Stelfox HT. Best Rounding Practices in the ICU. In: Bittner E, LaRosa J, editors. *Current Concepts In Adult Critical Care*. Mount Prospect, IL; 2016.
6. Kim MM, Barnato AE, Angus DC, Fleisher LA, Fleisher LF, Kahn JM. The effect of multidisciplinary care teams on intensive care unit mortality. *Arch Intern Med*. 2010; 170: 369–376. doi: [10.1001/archinternmed.2009.521](#) PMID: [20177041](#)
7. Young MP, Gooder VJ, Oltermann MH, Bohman CB, French TK, James BC. The impact of a multidisciplinary approach on caring for ventilator-dependent patients. *Int J Qual Health Care*. 1998; 10: 15–26. PMID: [10030783](#)
8. Ventura Ribal MR, Portillo Jáurena E, Verdaguer Cot M, Carrasco Gómez G, Cabré Pericas L, Balaquer Blasco R, et al. [Joint clinical rounds in the ICU and satisfaction of the professionals]. *Enferm Intensiva*. 2002; 13: 68–77. PMID: [12356377](#)
9. Miller A, Scheinkestel C, Limpus A, Joseph M, Karnik A, Venkatesh B. Uni- and interdisciplinary effects on round and handover content in intensive care units. *Hum Factors*. 2009; 51: 339–353. PMID: [19750796](#)
10. Weant KA, Armitstead JA, Ladha AM, Sasaki-Adams D, Hadar EJ, Ewend MG. Cost effectiveness of a clinical pharmacist on a neurosurgical team. *Neurosurgery*. 2009; 65: 946–950. doi: [10.1227/01.NEU.0000347090.22818.35](#) PMID: [19834408](#)
11. Leape LL, Cullen DJ, Clapp MD, Burdick E, Demonaco HJ, Erickson JI, et al. Pharmacist participation on physician rounds and adverse drug events in the intensive care unit. *JAMA*. 1999; 282: 267–270. PMID: [10422996](#)
12. Rivkin A, Yin H. Evaluation of the role of the critical care pharmacist in identifying and avoiding or minimizing significant drug-drug interactions in medical intensive care patients. *Journal of Critical Care*. 2011; 26: 104.e1–6. doi: [10.1016/j.jcrc.2010.04.014](#)
13. Al-Jazairi AS, Al-Agil AA, Asiri YA, Al-Kholi TA, Akhras NS, Horanieh BK. The impact of clinical pharmacist in a cardiac-surgery intensive care unit. *Saudi Med J*. 2008; 29: 277–281. PMID: [18246241](#)
14. White CM, Chow MSS. Cost impact and clinical benefits of focused rounding in the cardiovascular intensive care unit. *Hospital pharmacy*. Thomas Land; 1998; 33: 419–423.
15. Patel NP, Brandt CP, Yowler CJ. A prospective study of the impact of a critical care pharmacist assigned as a member of the multidisciplinary burn care team. *J Burn Care Res*. 2006; 27: 310–313. doi: [10.1097/01.BCR.0000216287.98801.96](#) PMID: [16679898](#)
16. Hill K. The sound of silence—nurses' non-verbal interaction within the ward round. *Nurs Crit Care*. 2003; 8: 231–239. doi: [10.1111/j.1362-1017.2003.00038.x](#) PMID: [14725388](#)
17. Vats A, Goin KH, Fortenberry JD. Lean analysis of a pediatric intensive care unit physician group rounding process to identify inefficiencies and opportunities for improvement. *Pediatr Crit Care Med*. 2011; 12: 415–421. doi: [10.1097/PCC.0b013e3181fe2e3c](#) PMID: [20975612](#)
18. Vats A, Goin KH, Villarreal MC, Yilmaz T, Fortenberry JD, Keskinocak P. The impact of a lean rounding process in a pediatric intensive care unit. *Critical Care Medicine*. 2012; 40: 608–617. doi: [10.1097/CCM.0b013e318232e2fc](#) PMID: [21983366](#)
19. Explicit approach to rounds in an ICU improves communication and satisfaction of providers. Springer-Verlag; 2003; 29: 1584–1588. doi: [10.1007/s00134-003-1815-y](#)
20. Wright S, Bowkett J, Bray K. The communication gap in the ICU—a possible solution. *Nurs Crit Care*. 1996; 1: 241–244. PMID: [9594125](#)
21. Knoll M, Lendner I. Nurses' perspective on interprofessional communication on an intensive care unit. *Pflege*. 2008; 21: 339–351. doi: [10.1024/1012-5302.21.5.339](#) PMID: [18850538](#)
22. Stockwell DC, Slonim AD, Pollack MM. Physician team management affects goal achievement in the intensive care unit. *Pediatr Crit Care Med*. 2007; 8: 540–545. doi: [10.1097/01.PCC.0000288709.15113.8A](#) PMID: [17906596](#)
23. Have Ten ECM, Nap RE, Tulleken JE. Quality improvement of interdisciplinary rounds by leadership training based on essential quality indicators of the Interdisciplinary Rounds Assessment Scale. 2013;39: 1800–1807. doi: [10.1007/s00134-013-3002-0](#)

24. Newkirk M, Pamplin JC, Kuwamoto R, Allen DA, Chung KK. Checklists change communication about key elements of patient care. *Journal of Trauma and Acute Care Surgery*. 2012; 73: S75–S82. doi: [10.1097/TA.0b013e3182606239](https://doi.org/10.1097/TA.0b013e3182606239) PMID: [22847100](https://pubmed.ncbi.nlm.nih.gov/22847100/)
25. Weiss CH, Moazed F, McEvoy CA, Singer BD, Szeleifer I, Amaral LAN, et al. Prompting Physicians to Address a Daily Checklist and Process of Care and Clinical Outcomes. *Am J Respir Crit Care Med*. 2011; 184: 680–686. doi: [10.1164/rccm.201101-0037OC](https://doi.org/10.1164/rccm.201101-0037OC) PMID: [21616996](https://pubmed.ncbi.nlm.nih.gov/21616996/)
26. Agarwal S, Frankel L, Tournier S, McMillan A, Sharek PJ. Improving communication in a pediatric intensive care unit using daily patient goal sheets. *Journal of Critical Care*. 2008; 23: 227–235. doi: [10.1016/j.jcrc.2007.07.001](https://doi.org/10.1016/j.jcrc.2007.07.001) PMID: [18538216](https://pubmed.ncbi.nlm.nih.gov/18538216/)
27. DuBose JJ, Inaba K, Shiflett A, Trankiem C, Teixeira PGR, Salim A, et al. Measurable Outcomes of Quality Improvement in the Trauma Intensive Care Unit: The Impact of a Daily Quality Rounding Checklist. *The Journal of Trauma: Injury, Infection, and Critical Care*. 2008; 64: 22–29. doi: [10.1097/TA.0b013e318161b0c8](https://doi.org/10.1097/TA.0b013e318161b0c8)
28. Narasimhan M, Eisen LA, Mahoney CD, Acerra FL, Rosen MJ. Improving nurse-physician communication and satisfaction in the intensive care unit with a daily goals worksheet. *Am J Crit Care*. 2006; 15: 217–222. PMID: [16501141](https://pubmed.ncbi.nlm.nih.gov/16501141/)
29. Hewson KM, Burrell AR. A pilot study to test the use of a checklist in a tertiary intensive care unit as a method of ensuring quality processes of care. *Anaesth Intensive Care*. 2006; 34: 322–328. PMID: [16802484](https://pubmed.ncbi.nlm.nih.gov/16802484/)
30. Stone ME Jr., Snetman D, O' Neill A, Cucuzzo J, Lindner J, Ahmad S, et al. Daily Multidisciplinary Rounds To Implement the Ventilator Bundle Decreases Ventilator-Associated Pneumonia in Trauma Patients: But Does It Affect Outcome? *Surgical Infections*. 2011; 12: 373–378. doi: [10.1089/sur.2010.067](https://doi.org/10.1089/sur.2010.067) PMID: [21933008](https://pubmed.ncbi.nlm.nih.gov/21933008/)
31. Pronovost PJ, Berenholtz S, Dorman T, Lipsett PA, Simmonds T, Haraden C. Improving communication in the ICU using daily goals. *Journal of Critical Care*. 2003; 18: 71–75. doi: [10.1053/jcrc.2003.50008](https://doi.org/10.1053/jcrc.2003.50008) PMID: [12800116](https://pubmed.ncbi.nlm.nih.gov/12800116/)
32. Phipps LM, Thomas NJ. The use of a daily goals sheet to improve communication in the paediatric intensive care unit. *Intensive Crit Care Nurs*. 2007; 23: 264–271. doi: [10.1016/j.iccn.2007.02.001](https://doi.org/10.1016/j.iccn.2007.02.001) PMID: [17434737](https://pubmed.ncbi.nlm.nih.gov/17434737/)
33. Wysham NG, Mularski RA, Schmidt DM, Nord SC, Louis DL, Shuster E, et al. Long-term persistence of quality improvements for an intensive care unit communication initiative using the VALUE strategy. *Journal of Critical Care*. 2014; 29: 450–454. doi: [10.1016/j.jcrc.2013.12.006](https://doi.org/10.1016/j.jcrc.2013.12.006) PMID: [24456811](https://pubmed.ncbi.nlm.nih.gov/24456811/)
34. Centofanti JE, Duan EH, Hoad NC, Swinton ME, Perri D, Waugh L, et al. Use of a daily goals checklist for morning ICU rounds: a mixed-methods study. *Critical Care Medicine*. 2014; 42: 1797–1803. doi: [10.1097/CCM.0000000000000331](https://doi.org/10.1097/CCM.0000000000000331) PMID: [24674928](https://pubmed.ncbi.nlm.nih.gov/24674928/)
35. Teixeira PGR, Inaba K, DuBose J, Melo N, Bass M, Belzberg H, et al. Measurable outcomes of quality improvement using a daily quality rounds checklist: two-year prospective analysis of sustainability in a surgical intensive care unit. *J Trauma Acute Care Surg*. 2013; 75: 717–721. doi: [10.1097/TA.0b013e31829d27b6](https://doi.org/10.1097/TA.0b013e31829d27b6) PMID: [24064888](https://pubmed.ncbi.nlm.nih.gov/24064888/)
36. Lyons MN, Standley TDA, Gupta AK. Quality improvement of doctors' shift-change handover in neurocritical care. *BMJ Quality & Safety*. 2010; 19: e62–e62. doi: [10.1136/qshc.2008.028977](https://doi.org/10.1136/qshc.2008.028977)
37. Alvarez G, Coiera E. Interruptive communication patterns in the intensive care unit ward round. *Int J Med Inform*. 2005; 74: 791–796. doi: [10.1016/j.ijmedinf.2005.03.017](https://doi.org/10.1016/j.ijmedinf.2005.03.017) PMID: [16024286](https://pubmed.ncbi.nlm.nih.gov/16024286/)
38. Friesdorf W, Konichezky S, Gross-Alltag F, Federolf G, Schwilk B, Wiedeck H. System ergonomic analysis of the morning ward round in an intensive care unit. *J Clin Monit*. 1994; 10: 201–209. PMID: [8027753](https://pubmed.ncbi.nlm.nih.gov/8027753/)
39. Collins SA, Bakken S, Vawdrey DK, Coiera E, Currie LM. Agreement between common goals discussed and documented in the ICU. *Journal of the American Medical Informatics Association*. 2010; 18: 45–50. doi: [10.1136/jamia.2010.006437](https://doi.org/10.1136/jamia.2010.006437) PMID: [21113075](https://pubmed.ncbi.nlm.nih.gov/21113075/)
40. Have Ten ECM, Nap RE. Mutual agreement between providers in intensive care medicine on patient care after interdisciplinary rounds. *J Intensive Care Med*. 2014; 29: 292–297. doi: [10.1177/0885066613486596](https://doi.org/10.1177/0885066613486596) PMID: [23753243](https://pubmed.ncbi.nlm.nih.gov/23753243/)
41. Landry M-A, Lafrenaye S, Roy M-C, Cyr C. A randomized, controlled trial of bedside versus conference-room case presentation in a pediatric intensive care unit. *Pediatrics*. 2007; 120: 275–280. doi: [10.1542/peds.2007-0107](https://doi.org/10.1542/peds.2007-0107) PMID: [17671052](https://pubmed.ncbi.nlm.nih.gov/17671052/)
42. Walden M, Elliott E, Gregurich MA. Delphi Survey of Barriers and Organizational Factors Influencing Nurses' Participation in Patient Care Rounds. *Newborn and Infant Nursing Reviews*. Elsevier Inc; 2009; 9: 169–174. doi: [10.1053/j.nainr.2009.07.001](https://doi.org/10.1053/j.nainr.2009.07.001)



43. Manias E, Street A. Nurse-doctor interactions during critical care ward rounds. *J Clin Nurs*. 2001; 10: 442–450. PMID: [11822491](#)
44. Coombs M. Power and conflict in intensive care clinical decision making. *Intensive Crit Care Nurs*. 2003; 19: 125–135. PMID: [12765632](#)
45. Family Presence on Rounds. 2012; 31: 53–64. doi: [10.1097/DCC.0b013e31824246dd](#)
46. Phipps LM, Bartke CN, Spear DA, Jones LF, Foerster CP, Killian ME, et al. Assessment of parental presence during bedside pediatric intensive care unit rounds: effect on duration, teaching, and privacy. *Pediatr Crit Care Med*. 2007; 8: 220–224. doi: [10.1097/01.PCC.0000262798.84416.C5](#) PMID: [17417129](#)
47. Rosen P, Stenger E, Bochkoris M, Hannon MJ, Kwok CK. Family-centered multidisciplinary rounds enhance the team approach in pediatrics. *Pediatrics*. American Academy of Pediatrics; 2009; 123: e603–8. doi: [10.1542/peds.2008-2238](#)
48. Aronson PL, Yau J, Helfaer MA, Morrison W. Impact of family presence during pediatric intensive care unit rounds on the family and medical team. *Pediatrics*. 2009; 124: 1119–1125. doi: [10.1542/peds.2009-0369](#) PMID: [19736262](#)
49. Latta LC, Dick R, Parry C, Tamura GS. Parental responses to involvement in rounds on a pediatric inpatient unit at a teaching hospital: a qualitative study. *Acad Med*. 2008; 83: 292–297. doi: [10.1097/ACM.0b013e3181637e21](#) PMID: [18316881](#)
50. Cameron MA, Schleien CL, Morris MC. Parental presence on pediatric intensive care unit rounds. *J Pediatr*. 2009; 155: 522–528. doi: [10.1016/j.jpeds.2009.03.035](#) PMID: [19555968](#)
51. Kuzin JK, Yborra JG, Taylor MD, Chang AC, Altman CA, Whitney GM, et al. Family-member presence during interventions in the intensive care unit: perceptions of pediatric cardiac intensive care providers. *Pediatrics*. 2007; 120: e895–901. doi: [10.1542/peds.2006-2943](#) PMID: [17908745](#)
52. Knoderer HM. Inclusion of parents in pediatric subspecialty team rounds: attitudes of the family and medical team. *Acad Med*. 2009; 84: 1576–1581. doi: [10.1097/ACM.0b013e3181bb2bed](#) PMID: [19858821](#)
53. Schiller WR, Anderson BF. Family as a member of the trauma rounds: a strategy for maximized communication. *J Trauma Nurs*. 2003; 10: 93–101. PMID: [16502828](#)
54. Rotman-Pikielny P, Rabin B, Amoyal S, Mushkat Y, Zissin R, Levy Y. Participation of family members in ward rounds: Attitude of medical staff, patients and relatives. *Patient Educ Couns*. 2007; 65: 166–170. doi: [10.1016/j.pec.2006.07.003](#) PMID: [16965891](#)
55. Rappaport DI, Cellucci MF, Leffler MG. Implementing family-centered rounds: pediatric residents' perceptions. *Clin Pediatr (Phila)*. SAGE Publications; 2010; 49: 228–234. doi: [10.1177/0009922809346568](#)
56. Santiago C, Lazar L, Jiang D, Burns KEA. A survey of the attitudes and perceptions of multidisciplinary team members towards family presence at bedside rounds in the intensive care unit. 2014;30: 13–21. doi: [10.1016/j.iccn.2013.06.003](#)
57. Ingram TC, Kamat P, Coopersmith CM, Vats A. Intensivist perceptions of family-centered rounds and its impact on physician comfort, staff involvement, teaching, and efficiency. *Journal of Critical Care*. 2014; 29: 915–918. doi: [10.1016/j.jcrc.2014.07.015](#) PMID: [25123794](#)
58. Institute of Medicine Committee on the Quality of Health Care in America. *Crossing The Quality Chasm: A New Health System For The 21st Century*. Washington, DC: National Academy Press; 2001 Mar pp. 1–8.
59. Donabedian A. The quality of care. How can it be assessed? *JAMA*. 1988; 260: 1743–1748. PMID: [3045356](#)
60. Zhang Y. *A Comparison of Statistical Models for Ordinal Clinical Outcomes*. Calgary, AB, Canada; 2014.
61. Braun V, Clarke V. *Using thematic analysis in psychology*. *Qualitative research in psychology*. Taylor & Francis; 2006; 3: 77–101.
62. Have Ten ECM, Hagedoorn M, Holman ND, Nap RE, Sanderman R, Tulleken JE. Assessing the quality of interdisciplinary rounds in the intensive care unit. *Journal of Critical Care*. 2013; 28: 476–482. doi: [10.1016/j.jcrc.2012.12.007](#) PMID: [23428713](#)
63. Hales B, Terblanche M, Fowler R, Sibbald W. Development of medical checklists for improved quality of patient care. *Int J Qual Health Care*. 2008; 20: 22–30. doi: [10.1093/intqhc/mzm062](#) PMID: [18073269](#)
