# Supplementary material for: A Survey of Rounding Practices in Canadian Adult Intensive Care Units
Source: PubMed Central journal article supplement (PMC4689549; doi:10.1371/journal.pone.0145408), 2015-12-23
Supplement: pone.0145408.s003.pdf [file pone.0145408.s003.pdf]

**Supplemental File 3**

Table A. Survey Responses

**Table A. Raw Survey Results**

| # | Question                                                                                                                                                                                           | Responses (N=111)                                  |
|---|----------------------------------------------------------------------------------------------------------------------------------------------------------------------------------------------------|----------------------------------------------------|
| 1 | What is your role in the Intensive Care Unit<br>Medical Director<br>ICU Physician<br>Nurse Manager<br>Patient Care Coordinator                                                                     | 45<br>49<br>12<br>1                                |
| 2 | <i>Responses contained identifying information</i>                                                                                                                                                 |                                                    |
| 3 | What province is your hospital located in?<br>Alberta<br>British Columbia<br>Manitoba<br>New Brunswick<br>Newfoundland<br>Nova Scotia<br>Ontario<br>Prince Edward Island<br>Quebec<br>Saskatchewan | 13<br>21<br>4<br>3<br>1<br>2<br>32<br>0<br>29<br>6 |
| 4 | What types of patients are usually cared for in your ICU?*                                                                                                                                         | 110<br>108<br>61<br>56<br>44<br>20<br>14           |
| 5 | Can your ICU care for ventilated patients?<br>Yes<br>No                                                                                                                                            | 109<br>1                                           |
| 6 | On, average how many operational beds are in your ICU?                                                                                                                                             | Median: 13 (IQR 12)<br>Range: 3 – 38               |
| 7 | Does your ICU use an open or closed model of care?<br>Open<br>Closed<br>Mixed                                                                                                                      | 15<br>94<br>2                                      |
| 8 | Does your ICU regularly host residents?<br>Yes<br>No                                                                                                                                               | 79<br>32                                           |

| #  | Question                                                                      | Responses (N=111) |
|----|-------------------------------------------------------------------------------|-------------------|
| 9  | Which of the following types of rounds happen on a daily basis in your unit?* |                   |
|    | Pre-rounding                                                                  | 67                |
|    | Multidisciplinary rounds                                                      | 89                |
|    | Post-rounding                                                                 | 52                |
|    | Sign-out rounds                                                               | 70                |
|    | Diagnostic imaging rounds                                                     | 31                |
|    | Rapid fire or bullet rounds                                                   | 54                |
| 10 | In your unit who is involved in patient care rounds on a regular basis?*      |                   |
|    | Attending Physician                                                           | 108               |
|    | ICU Fellows                                                                   | 33                |
|    | ICU Residents                                                                 | 64                |
|    | Medical Students                                                              | 47                |
|    | Bedside Nurses                                                                | 103               |
|    | Other Nursing Positions                                                       | 61                |
|    | Nurse Practitioners                                                           | 14                |
|    | Pharmacists                                                                   | 94                |
|    | Respiratory Therapists                                                        | 98                |
|    | Dieticians                                                                    | 81                |
|    | Physiotherapists                                                              | 50                |
|    | Social Workers                                                                | 41                |
|    | Other                                                                         | 7                 |
| 11 | In your unit where do patient care rounds regularly occur?*                   |                   |
|    | At the patients bedside                                                       | 59                |
|    | In the hallway by the patients bed                                            | 48                |
|    | In a conference room                                                          | 13                |
|    | At a nursing station                                                          | 6                 |
| 12 | Is there a standard starting time for patient care rounds in your unit?       |                   |
|    | Never (0 days per week)                                                       | 11                |
|    | Sometimes (1 – 3 days per week)                                               | 11                |
|    | Usually (4 – 6 days per week)                                                 | 49                |
|    | Always (7 days per week)                                                      | 33                |
| 13 | Is there a standard starting location for patient care rounds in your unit?   |                   |
|    | Never (0 days per week)                                                       | 34                |
|    | Sometimes (1 – 3 days per week)                                               | 13                |

| #  | Question                                                                                                                                                                                                                                                                                                 | Responses (N=111)     |
|----|----------------------------------------------------------------------------------------------------------------------------------------------------------------------------------------------------------------------------------------------------------------------------------------------------------|-----------------------|
|    | Usually (4 – 6 days per week)                                                                                                                                                                                                                                                                            | 26                    |
|    | Always (7 days per week)                                                                                                                                                                                                                                                                                 | 33                    |
| 14 | Are patient care rounds an open environment in your unit where all participants feel safe to voice their opinion?<br>Never<br>Sometimes (< ½ of patients rounded on)<br>Usually (> ½ of patients rounded on)<br>Always                                                                                   | 1<br>5<br>35<br>64    |
| 15 | Are patient care rounds a collaborative environment in your unit where all health care providers are encouraged to participate and all opinions are considered when creating the patient care plan?<br>Never<br>Sometimes (< ½ of patients rounded on)<br>Usually (> ½ of patients rounded on)<br>Always | 2<br>13<br>36<br>54   |
| 16 | How often are patient care rounds interrupted by answering pages?<br>Never<br>Sometimes (< ½ of patients rounded on)<br>Usually (> ½ of patients rounded on)<br>Always                                                                                                                                   | 10<br>633<br>21<br>10 |
|    | How often are patient care rounds interrupted by answering phone calls?<br>Never<br>Sometimes (< ½ of patients rounded on)<br>Usually (> ½ of patients rounded on)<br>Always                                                                                                                             | 6<br>64<br>26<br>9    |
|    | How often are patient care rounds interrupted by requesting consultations?<br>Never<br>Sometimes (< ½ of patients rounded on)<br>Usually (> ½ of patients rounded on)<br>Always                                                                                                                          | 21<br>68<br>10<br>2   |
|    | How often are patient care rounds interrupted by receiving consultations?<br>Never<br>Sometimes (< ½ of patients rounded on)                                                                                                                                                                             | 21<br>68              |

| # | Question                                                                                        | Responses (N=111) |
|---|-------------------------------------------------------------------------------------------------|-------------------|
|   | Usually (> ½ of patients rounded on)                                                            | 14                |
|   | Always                                                                                          | 2                 |
|   | How often are patient care rounds interrupted by emergent issues concerning other patients?     |                   |
|   | Never                                                                                           | 10                |
|   | Sometimes (< ½ of patients rounded on)                                                          | 77                |
|   | Usually (> ½ of patients rounded on)                                                            | 15                |
|   | Always                                                                                          | 2                 |
|   | How often are patient care rounds interrupted by non-emergent issues concerning other patients? |                   |
|   | Never                                                                                           | 34                |
|   | Sometimes (< ½ of patients rounded on)                                                          | 55                |
|   | Usually (> ½ of patients rounded on)                                                            | 15                |
|   | Always                                                                                          | 1                 |
|   | How often are patient care rounds interrupted by code blues?                                    |                   |
|   | Never                                                                                           | 56                |
|   | Sometimes (< ½ of patients rounded on)                                                          | 41                |
|   | Usually (> ½ of patients rounded on)                                                            | 5                 |
|   | Always                                                                                          | 1                 |
|   | How often are patient care rounds interrupted by rapid response/medical emergency calls?        |                   |
|   | Never                                                                                           | 66                |
|   | Sometimes (< ½ of patients rounded on)                                                          | 26                |
|   | Usually (> ½ of patients rounded on)                                                            | 6                 |
|   | Always                                                                                          | 2                 |
|   | How often are patient care rounds interrupted by new patient admissions?                        |                   |
|   | Never                                                                                           | 27                |
|   | Sometimes (< ½ of patients rounded on)                                                          | 69                |
|   | Usually (> ½ of patients rounded on)                                                            | 6                 |
|   | Always                                                                                          | 2                 |
|   | How often are patient care rounds interrupted by tests and/or procedures?                       |                   |
|   | Never                                                                                           | 32                |
|   | Sometimes (< ½ of patients rounded on)                                                          | 64                |
|   | Usually (> ½ of patients rounded on)                                                            | 7                 |
|   | Always                                                                                          | 1                 |

| #  | Question                                                                                                                                                                                                                                                                                                                                                                       | Responses (N=111)                                 |
|----|--------------------------------------------------------------------------------------------------------------------------------------------------------------------------------------------------------------------------------------------------------------------------------------------------------------------------------------------------------------------------------|---------------------------------------------------|
| 17 | <p>If the patient is awake and aware, how is the patient handled during patient care rounds in your unit?</p> <p>The patient is allowed and encouraged to attend rounds</p> <p>The patient is allowed but <b>not</b> encouraged to attend rounds</p> <p>The patient is allowed to attend but it is preferable that they do not</p> <p>The patient is not allowed to attend</p> | <p>28</p> <p>32</p> <p>28</p> <p>18</p>           |
| 18 | <p>If the patient is to participate in rounds what is their role?*</p> <p>Observe</p> <p>Provide additional information</p> <p>Ask questions</p> <p>Participate in shared decision making</p> <p>Receive an update</p>                                                                                                                                                         | <p>46</p> <p>60</p> <p>59</p> <p>38</p> <p>59</p> |
| 19 | <p>How is the family handled during patient care rounds in your unit?</p> <p>The family is allowed and encouraged to attend rounds</p> <p>The family is allowed but <b>not</b> encouraged to attend rounds</p> <p>The family is allowed to attend but it is preferable that they do not</p> <p>The family is not allowed to attend</p>                                         | <p>12</p> <p>32</p> <p>26</p> <p>36</p>           |
| 20 | <p>If the family of the patient is to attend rounds, what is their role?*</p> <p>Observe</p> <p>Provide additional information</p> <p>Ask questions</p> <p>Participate in shared decision making</p> <p>Receive an update</p>                                                                                                                                                  | <p>48</p> <p>48</p> <p>50</p> <p>28</p> <p>48</p> |
| 21 | <p>How often does the typical family of the patient attend patient care round?</p> <p>Never (0 days per week)</p> <p>Sometimes (1 – 3 days per week)</p> <p>Usually (4 – 6 days per week)</p> <p>Always (7 days per week)</p>                                                                                                                                                  | <p>21</p> <p>42</p> <p>6</p> <p>0</p>             |

Holodinsky et al., A Survey of Rounding Practices In Canadian Adult Intensive Care Units

| #  | Question                                                                                                     | Responses (N=111)                                                       |
|----|--------------------------------------------------------------------------------------------------------------|-------------------------------------------------------------------------|
| 22 | How many patients are typically rounded on in one day?                                                       | Median: 11 (IQR 6)<br>Range: 1 – 30                                     |
| 23 | How much time (in minutes) is typically spent with each patient                                              | Median: 15 (IQR 10)<br>Range: 4 – 45                                    |
| 24 | What percentage of patient care rounds is spent on the following items:<br>Patient Care<br>Teaching<br>Other | Median: 80% (IQR 17.5%)<br>Median: 20% (IQR 15%)<br>Median: 0% (IQR 5%) |
| 25 | Does your unit use any of the following during patient care rounds:*                                         |                                                                         |
|    | A rounding checklist                                                                                         | 31                                                                      |
|    | A patient goal sheet                                                                                         | 16                                                                      |
|    | Other tool to facilitate patient care rounds                                                                 | 17                                                                      |
|    | No tools are used to facilitate rounds                                                                       | 53                                                                      |
| 27 | How often to medical errors occur as a result of rounding processes in your ICU?                             |                                                                         |
|    | Never                                                                                                        | 58                                                                      |
|    | Sometimes                                                                                                    | 43                                                                      |
|    | Usually                                                                                                      | 0                                                                       |
|    | Always                                                                                                       | 0                                                                       |
| 28 | How efficient are patient care rounds in your ICU?                                                           |                                                                         |
|    | Never                                                                                                        |                                                                         |
|    | Sometimes                                                                                                    | 4                                                                       |
|    | Usually                                                                                                      | 17                                                                      |
|    | Always                                                                                                       | 70                                                                      |
|    |                                                                                                              | 11                                                                      |
| 29 | How often do patient care rounds result in a tangible care plan for the patient in your ICU?                 |                                                                         |
|    | Never                                                                                                        | 0                                                                       |
|    | Sometimes                                                                                                    | 11                                                                      |
|    | Usually                                                                                                      | 63                                                                      |
|    | Always                                                                                                       | 29                                                                      |
| 30 | How often does the rounding process slow patient care in your ICU?                                           |                                                                         |
|    | Never                                                                                                        | 24                                                                      |
|    | Sometimes                                                                                                    | 74                                                                      |
|    | Usually                                                                                                      | 5                                                                       |
|    | Always                                                                                                       | 0                                                                       |

| #  | Question                                                                                                                   | Responses (N=111)                  |
|----|----------------------------------------------------------------------------------------------------------------------------|------------------------------------|
| 31 | How often are patient care rounds equitable in your unit?<br>Never<br>Sometimes<br>Usually<br>Always                       | 1<br>11<br>48<br>42                |
| 32 | On a scale from 1 through 10 please rate the quality of patient care rounds in your unit                                   | Median: 7 (IQR 1)<br>Range: 3 – 10 |
| 33 | On a scale from 1 through 10 please rate how much opportunity there is for improvement in patient care rounds in your unit | Median: 7 (IQR 3)<br>Range: 2 – 10 |

\*Numbers may sum to greater than 111 as multiple answers could be selected
