# Supplementary material for: A Survey of Rounding Practices in Canadian Adult Intensive Care Units
Source: PubMed Central journal article supplement (PMC4689549; doi:10.1371/journal.pone.0145408), 2015-12-23
Supplement: pone.0145408.s005.pdf [file pone.0145408.s005.pdf]

| Affix Patient Label Here |                                                                                                                                                          | Diagnosis:                                                                                        |                                                                                                                                                                                                        |                  |
|--------------------------|----------------------------------------------------------------------------------------------------------------------------------------------------------|---------------------------------------------------------------------------------------------------|--------------------------------------------------------------------------------------------------------------------------------------------------------------------------------------------------------|------------------|
|                          |                                                                                                                                                          | ICU Day:                                                                                          |                                                                                                                                                                                                        |                  |
|                          |                                                                                                                                                          | Code Status:                                                                                      |                                                                                                                                                                                                        |                  |
| Reporting Items          |                                                                                                                                                          | Labs/Imaging<br>(Abnormal Data Only)                                                              | Best Practices                                                                                                                                                                                         | Daily Goals/Plan |
| CNS                      | RASS<br>ICDSC/CAM-ICU<br>Sedation/Analgesia/Pain Score<br>GCS<br>Sleep<br>Seizures<br>ICP/ CPP<br>CSF Drainage                                           | Head CT/MRI:<br><br>Dilantin Level:<br><br>CSF:                                                   | Target RASS<br>Delirium Screening/Strategies<br>Sedation Vacation/SAT Candidate<br>Early Mobilization/Fall Risk<br>Restraints Required<br>Need for cEEG<br>Need for ICP Monitoring<br>Spinal Clearance | 1.               |
|                          | BP<br>HR/Rhythm<br>CVP/Fluid Boluses<br>Max Temp<br>Vasopressors/Inotropes<br>Edema                                                                      | K <sup>+</sup> /Mg <sup>2+</sup> :<br><br>CBC:<br><br>Echo:                                       | DVT Prophylaxis<br>Leg Dopplers<br>Transfusion Trigger                                                                                                                                                 |                  |
|                          | O <sub>2</sub> Mode/Requirements<br>Ventilator Mode/Settings<br>Respiratory Rate<br>O <sub>2</sub> Saturation<br>Nebulizers<br>Secretions<br>Chest Tubes | pH:<br><br>pCO <sub>2</sub> /pO <sub>2</sub> :<br><br>HCO <sub>3</sub> /BE:<br><br>Chest Imaging: | VAP Prevention<br>SBT Candidate<br>Tracheostomy Candidate                                                                                                                                              |                  |
| GI                       | Feed Type/Rate<br>Feed Tolerance<br>NG/OG placement/days in situ<br>Bowel Movements<br>Intra-abdominal Pressure<br>Wounds/Drains/Ostomies                | Electrolytes:<br><br>Glucose:<br><br>LFT:                                                         | Early Nutrition<br>PUD Prophylaxis<br>Bowel Protocol<br>Glycemic Control                                                                                                                               | 3.               |
| GU                       | Urine Output<br>Fluid Balance (24h/Cumulative)<br>Foley placement/days in situ<br>Diuretics<br>Hemodialysis/CRRT                                         | Creatinine/BUN:<br><br>Na <sup>+</sup> /K <sup>+</sup> :<br><br>HCO <sub>3</sub> :                | TFI Order<br>Fluid Balance Goal<br>Need for Dialysis                                                                                                                                                   | 4.               |
| IPC                      | Febrile<br>Antibiotics<br>Skin Integrity<br>Wounds<br>CVC site/days in situ<br>Arterial Line site/days in situ                                           | WBC:<br><br>Cultures:<br><br>Abx Levels:                                                          | Isolation Protocol<br>Sepsis Protocol<br>Narrow/Stop Antibiotics<br>CLI Prevention                                                                                                                     | 5.               |
| Meds<br>Labs             | Current Medications/Dosages<br><br>Other Labs                                                                                                            |                                                                                                   | Narrow/Stop Medications<br>Change Route<br>Adjust for Renal Function<br>Medication Reconciliation                                                                                                      |                  |
| Social                   | Social History<br>Social Work/Spiritual Care<br>Changes to Code Status<br>Patient/Family Concerns                                                        |                                                                                                   | Representative Identified<br>Patient/Family Updated<br>Early Discharge Planning                                                                                                                        |                  |
| Research                 | Eligible for Research<br><br>On Research Protocol                                                                                                        |                                                                                                   |                                                                                                                                                                                                        |                  |
